# Supplementary material for: Cancer specific promoter CpG Islands hypermethylation of HOP homeobox (HOPX) gene and its potential tumor suppressive role in pancreatic carcinogenesis
Source: PubMed Central journal article supplement (PMC3488580; doi:10.1186/1471-2407-12-397), 2012-09-07
Supplement: 1471-2407-12-397-S1.pdf [file 1471-2407-12-397-S1.pdf]

Supplemental Table 1. Characteristics and prognostic analysis in 89 patients with pancreatic cancer

| Variables                                                  | Number | MST (month) | 5 year DSS<br>Percentage (%) | univariable analysis | multivariable analysis <sup>‡</sup> |                      |
|------------------------------------------------------------|--------|-------------|------------------------------|----------------------|-------------------------------------|----------------------|
|                                                            |        |             |                              | P Value <sup>a</sup> | HR (95%CI)                          | P Value <sup>b</sup> |
| <b>Age (years)</b>                                         |        |             |                              |                      |                                     |                      |
| <65/≥65                                                    | 51/38  | 11.1/18.6   | 15.1/20.2                    | 0.1                  | -                                   | -                    |
| <b>Gender</b>                                              |        |             |                              |                      |                                     |                      |
| Male/Female                                                | 46/43  | 11.3/16.4   | 12.3/22.1                    | 0.13                 | -                                   | -                    |
| <b>Methylation value of HOPX-β</b>                         |        |             |                              |                      |                                     |                      |
| <1.55/≥1.55                                                | 15/74  | 16.4/12.1   | 20.0/6.7                     | 0.4                  | -                                   | -                    |
| <b>preoperative serum CA19-9</b>                           |        |             |                              |                      |                                     |                      |
| <37 U/ml/≥37 U/ml                                          | 23/66  | -/10.4      | 53.0/4.6                     | <0.0001              | 3.31 (1.48-7.41)                    | 0.0016               |
| <b>Location</b>                                            |        |             |                              |                      |                                     |                      |
| head                                                       | 68     | 11.3        | 17.9                         | 0.3                  |                                     |                      |
| body                                                       | 15     | 29.5        | 16.3                         |                      |                                     |                      |
| tail                                                       | 6      | 16.33       | 0.0                          |                      |                                     |                      |
| <b>Growth pattern</b>                                      |        |             |                              |                      |                                     |                      |
| nodular/other                                              | 35/54  | 18.6/10.4   | 19.7/16.0                    | 0.05                 | -                                   | -                    |
| <b>histology</b>                                           |        |             |                              |                      |                                     |                      |
| well                                                       | 37     | 18.8        | 22.5                         | 0.02                 | reference                           | 0.028                |
| moderately                                                 | 34     | 11.1        | 13.5                         |                      | 1.57 (0.85-2.88)                    |                      |
| poor                                                       | 18     | 6.5         | 12.5                         |                      | 2.74 (1.32-5.68)                    |                      |
| <b>tumor size (cm)</b>                                     |        |             |                              |                      |                                     |                      |
| ≤2                                                         | 13     | 39.1        | 40.0                         | 0.2                  | -                                   | -                    |
| 2<ts≤4                                                     | 61     | 12          | 14.4                         |                      |                                     |                      |
| 4<ts≤6                                                     | 13     | 14.8        | 18.2                         |                      |                                     |                      |
| <6                                                         | 2      | 11.5        | 0.0                          |                      |                                     |                      |
| <b>ND factor</b>                                           |        |             |                              |                      |                                     |                      |
| ND<10/ND10                                                 | 50/39  | 16.4/9.5    | 26.3/7.2                     | 0.01                 | 0.94 (0.52-1.70)                    | 0.85                 |
| <b>pancreatic cut end margin (PCM)</b>                     |        |             |                              |                      |                                     |                      |
| negative/positive                                          | 74/14  | 16.0/12.1   | 21.5/0.0                     | 0.1                  | -                                   | -                    |
| <b>bile duct cut end margin (BCM)</b>                      |        |             |                              |                      |                                     |                      |
| negative/positive                                          | 70/1   | 11.9/14.8   | 20.2/9.4                     | 0.9                  | -                                   | -                    |
| <b>dissected pancreatic tissue margin (DPM)</b>            |        |             |                              |                      |                                     |                      |
| negative/positive                                          | 48/41  | 19.7/8.9    | 33.3/0.0                     | <0.0001              | 2.82 (1.17-6.80)                    | 0.013                |
| <b>residual tumor (R factor)</b>                           |        |             |                              |                      |                                     |                      |
| 0                                                          | 35     | 23.5        | 38.3                         | 0.0002               | reference                           | 0.45                 |
| 1                                                          | 40     | 11.9        | 7.2                          |                      | 0.77 (0.30-1.92)                    |                      |
| 2                                                          | 14     | 7.1         | 0.0                          |                      | 1.16 (0.35-3.77)                    |                      |
| <b>stage (JPS)</b>                                         |        |             |                              |                      |                                     |                      |
| III                                                        | 39     | 23.5        | 28.3                         | <0.0001              | reference                           | 0.0085               |
| IVa                                                        | 26     | 12.1        | 19.1                         |                      | 2.06 (1.00-4.20)                    |                      |
| IVb                                                        | 24     | 7.1         | 0.0                          |                      | 3.16 (1.48-6.73)                    |                      |
| <b>T factor (JPS)</b>                                      |        |             |                              |                      |                                     |                      |
| 1                                                          | 1      | -           | 100.0                        | 0.006                | -                                   | -                    |
| 2                                                          | 3      | 10          | 0.0                          |                      |                                     |                      |
| 3                                                          | 58     | 17.4        | 22.5                         |                      |                                     |                      |
| 4                                                          | 27     | 8.9         | 9.2                          |                      |                                     |                      |
| <b>lymph node metastasis (N) (JPS)</b>                     |        |             |                              |                      |                                     |                      |
| 0                                                          | 23     | 18.6        | 35.5                         | 0.01                 | -                                   | -                    |
| 1                                                          | 34     | 17          | 16.8                         |                      |                                     |                      |
| 2                                                          | 19     | 11.1        | 13.4                         |                      |                                     |                      |
| 3                                                          | 13     | 7.2         | 0.0                          |                      |                                     |                      |
| <b>distant metastasis (M) (JPS)</b>                        |        |             |                              |                      |                                     |                      |
| absence/presence                                           | 82/7   | 16.3/7.0    | 18.6/0.0                     | 0.0003               | -                                   | -                    |
| <b>stage (UICC)</b>                                        |        |             |                              |                      |                                     |                      |
| IB                                                         | 1      | -           | 100.0                        | <0.0001              | -                                   | -                    |
| IIA                                                        | 21     | 18.6        | 33.6                         |                      |                                     |                      |
| IIB                                                        | 46     | 17.3        | 17.8                         |                      |                                     |                      |
| III                                                        | 3      | 3.6         | 0.0                          |                      |                                     |                      |
| IV                                                         | 18     | 7.2         | 0.0                          |                      |                                     |                      |
| <b>T factor (UICC)</b>                                     |        |             |                              |                      |                                     |                      |
| 1                                                          | 3      | 26.5        | 0.0                          | <0.0001              | -                                   | -                    |
| 2                                                          | 7      | 18.2        | 28.6                         |                      |                                     |                      |
| 3                                                          | 78     | 14.8        | 17.0                         |                      |                                     |                      |
| 4                                                          | 1      | 2.2         | 0.0                          |                      |                                     |                      |
| <b>lymph node metastasis (N) (UICC)</b>                    |        |             |                              |                      |                                     |                      |
| 0/1                                                        | 23/66  | 18.6/11.3   | 35.5/12.2                    | 0.02                 | -                                   | -                    |
| <b>distant metastasis (M) (UICC)</b>                       |        |             |                              |                      |                                     |                      |
| absence/presence                                           | 71/18  | 17.3/7.2    | 22.1/0.0                     | <0.0001              | -                                   | -                    |
| <b>operation</b>                                           |        |             |                              |                      |                                     |                      |
| PD                                                         | 67     | 11.3        | 18.7                         | 0.3                  | -                                   | -                    |
| DP                                                         | 20     | 18.8        | 11.1                         |                      |                                     |                      |
| TP                                                         | 2      | -           | 100.0                        |                      |                                     |                      |
| <b>lymph node dissection (D)</b>                           |        |             |                              |                      |                                     |                      |
| 0,1                                                        | 11     | 18.4        | 55.5                         | 0.3                  | -                                   | -                    |
| 2                                                          | 32     | 16.3        | 25.3                         |                      |                                     |                      |
| 2+α                                                        | 40     | 11.1        | 17.0                         |                      |                                     |                      |
| 3                                                          | 6      | 9.5         | 0.0                          |                      |                                     |                      |
| <b>post operative therapy (including adjuvant therapy)</b> |        |             |                              |                      |                                     |                      |
| absence/presence                                           | 32/57  | 11.9/16.4   | 8.4/20.9                     | 0.1                  | -                                   | -                    |
| <b>Methylation value of HOPX-β</b>                         |        |             |                              |                      |                                     |                      |
| <3.6/≥3.6                                                  | 23/66  | 16.4/12.1   | 19.2/9.6                     | 0.9                  | -                                   | -                    |

Abbreviations: DSS disease-specific survival; MST median survival time; HR hazard ratio; CI confidence interval

<sup>a</sup> log-rank test<sup>b</sup> significant based on Cox's proportional hazard model<sup>‡</sup> Multivariable analysis was indicated excluding constructing factors of JPS staging system, and UICC staging system was not adopted due to divide.
