# Supplementary material for: Cancer specific promoter CpG Islands hypermethylation of HOP homeobox (HOPX) gene and its potential tumor suppressive role in pancreatic carcinogenesis
Source: PubMed Central journal article supplement (PMC3488580; doi:10.1186/1471-2407-12-397), 2012-09-07
Supplement: 1471-2407-12-397-S2.pdf [file 1471-2407-12-397-S2.pdf]

Supplemental Table 2. Correlation analysis between HOPX-β methylation status and clinicopathological variables (n= 89)

| Variables                                                  | Total number | HOPX-β hypermethylation |            |                   | P value |
|------------------------------------------------------------|--------------|-------------------------|------------|-------------------|---------|
|                                                            |              | negativity              | positivity | positive rate (%) |         |
| <b>Age (years)</b>                                         |              |                         |            |                   |         |
| <65                                                        | 51           | 12                      | 39         | 76                | 0.28    |
| ≥65                                                        | 38           | 3                       | 35         | 92                |         |
| <b>Gender</b>                                              |              |                         |            |                   |         |
| Male                                                       | 46           | 7                       | 39         | 85                | 0.66    |
| Female                                                     | 43           | 8                       | 35         | 81                |         |
| <b>preoperative serum CA19-9</b>                           |              |                         |            |                   |         |
| <37 U/ml                                                   | 23           | 2                       | 21         | 91                | 0.33    |
| ≥37 U/ml                                                   | 66           | 13                      | 53         | 80                |         |
| <b>Location</b>                                            |              |                         |            |                   |         |
| head                                                       | 68           | 12                      | 56         | 82                | 0.81*   |
| body                                                       | 15           | 2                       | 13         | 81                |         |
| tail                                                       | 6            | 1                       | 5          | 83                |         |
| <b>Growth pattern</b>                                      |              |                         |            |                   |         |
| nodular                                                    | 35           | 5                       | 30         | 86                | 0.6     |
| other                                                      | 54           | 10                      | 44         | 81                |         |
| <b>histology</b>                                           |              |                         |            |                   |         |
| well                                                       | 37           | 8                       | 29         | 78                | 0.45*   |
| moderately                                                 | 34           | 5                       | 29         | 85                |         |
| poor                                                       | 18           | 2                       | 16         | 89                |         |
| <b>tumor size (cm)</b>                                     |              |                         |            |                   |         |
| ≤2                                                         | 13           | 3                       | 10         | 77                | 0.16*   |
| 2<ts≤4                                                     | 61           | 12                      | 49         | 80                |         |
| 4<ts≤6                                                     | 13           | 0                       | 13         | 100               |         |
| <6                                                         | 2            | 0                       | 2          | 100               |         |
| <b>ND factor</b>                                           |              |                         |            |                   |         |
| ND<10                                                      | 50           | 8                       | 42         | 84                | 0.8     |
| ND10                                                       | 39           | 7                       | 32         | 82                |         |
| <b>pancreatic cut end margin (PCM)</b>                     |              |                         |            |                   |         |
| absence                                                    | 75           | 13                      | 62         | 83                | >0.99   |
| presence                                                   | 14           | 2                       | 12         | 86                |         |
| <b>bile duct cut end margin (BCM)</b>                      |              |                         |            |                   |         |
| absence                                                    | 70           | 12                      | 58         | 83                | >0.99   |
| presence                                                   | 1            | 0                       | 1          | 100               |         |
| <b>dissected pancreatic tissue margin (DPM)</b>            |              |                         |            |                   |         |
| absence                                                    | 48           | 7                       | 41         | 85                | 0.53    |
| presence                                                   | 41           | 8                       | 33         | 80                |         |
| <b>residual tumor (R factor)</b>                           |              |                         |            |                   |         |
| 0                                                          | 35           | 3                       | 32         | 91                | 0.27*   |
| 1                                                          | 40           | 10                      | 30         | 75                |         |
| 2                                                          | 14           | 2                       | 12         | 86                |         |
| <b>stage (JPS)</b>                                         |              |                         |            |                   |         |
| III                                                        | 39           | 7                       | 32         | 82                | 0.66*   |
| IVa                                                        | 26           | 5                       | 21         | 81                |         |
| IVb                                                        | 24           | 3                       | 21         | 88                |         |
| <b>T factor (JPS)</b>                                      |              |                         |            |                   |         |
| 1                                                          | 1            | 0                       | 1          | 100               | 0.97*   |
| 2                                                          | 3            | 0                       | 3          | 100               |         |
| 3                                                          | 58           | 11                      | 47         | 81                |         |
| 4                                                          | 27           | 4                       | 23         | 85                |         |
| <b>lymph node metastasis (N) (JPS)</b>                     |              |                         |            |                   |         |
| 0                                                          | 23           | 4                       | 19         | 83                | 0.71*   |
| 1                                                          | 34           | 6                       | 28         | 82                |         |
| 2                                                          | 19           | 4                       | 15         | 79                |         |
| 3                                                          | 13           | 1                       | 12         | 92                |         |
| <b>distant metastasis (M) (JPS)</b>                        |              |                         |            |                   |         |
| absence                                                    | 82           | 14                      | 68         | 83                | >0.99   |
| presence                                                   | 7            | 1                       | 6          | 86                |         |
| <b>stage (UICC)</b>                                        |              |                         |            |                   |         |
| IB                                                         | 1            | 0                       | 1          | 100               | 0.53*   |
| IIA                                                        | 21           | 4                       | 17         | 81                |         |
| IIB                                                        | 46           | 9                       | 37         | 80                |         |
| III                                                        | 3            | 0                       | 3          | 100               |         |
| IV                                                         | 18           | 2                       | 16         | 89                |         |
| <b>T factor (UICC)</b>                                     |              |                         |            |                   |         |
| 1                                                          | 3            | 1                       | 2          | 67                | 0.8*    |
| 2                                                          | 7            | 1                       | 6          | 86                |         |
| 3                                                          | 78           | 13                      | 65         | 83                |         |
| 4                                                          | 1            | 0                       | 1          | 100               |         |
| <b>lymph node metastasis (N) (UICC)</b>                    |              |                         |            |                   |         |
| 0                                                          | 23           | 4                       | 19         | 83                | >0.99   |
| 1                                                          | 66           | 11                      | 55         | 83                |         |
| <b>distant metastasis (M) (UICC)</b>                       |              |                         |            |                   |         |
| absence                                                    | 71           | 13                      | 58         | 82                | 0.72    |
| presence                                                   | 18           | 2                       | 16         | 89                |         |
| <b>operation</b>                                           |              |                         |            |                   |         |
| PD                                                         | 67           | 12                      | 55         | 82                | 0.77*   |
| DP                                                         | 20           | 3                       | 17         | 85                |         |
| TP                                                         | 2            | 0                       | 2          | 100               |         |
| <b>lymph node dissection (D)</b>                           |              |                         |            |                   |         |
| 0,1                                                        | 11           | 2                       | 9          | 82                | 0.19*   |
| 2                                                          | 32           | 8                       | 24         | 75                |         |
| 2+a                                                        | 40           | 4                       | 36         | 90                |         |
| 3                                                          | 6            | 1                       | 5          | 83                |         |
| <b>post operative therapy (including adjuvant therapy)</b> |              |                         |            |                   |         |
| absence                                                    | 32           | 4                       | 28         | 88                | 0.55    |
| presence                                                   | 57           | 11                      | 46         | 81                |         |

\* Kruskal-Wallis rank test, the remaining variables: Fisher's exact test or chi-square test
